# Supplementary material for: Synthesis and properties of n-type triphenylpyridine derivatives and applications in deep-blue organic light-emitting devices as electron-transporting layer
Source: Royal Society of Chemistry journal article supplement (doi:10.1039/c1jm11898f), 2011-01-01
Supplement: c1jm11898f.pdf [file c1jm11898f.pdf]

## Supplementary information for

# Synthesis and Properties of n-Type Triphenylpyridine Derivatives and Applications in Deep-Blue Organic Light-emitting Devices as Electron-Transporting Layer

Na Li,<sup>a</sup> Shiu-Lun Lai,<sup>b</sup> Weimin Liu,<sup>a</sup> Pengfei Wang,<sup>\*a</sup> Juanjuan You,<sup>a</sup> Chun-Sing Lee,<sup>\*b</sup> and Zengtao Liu<sup>b</sup>

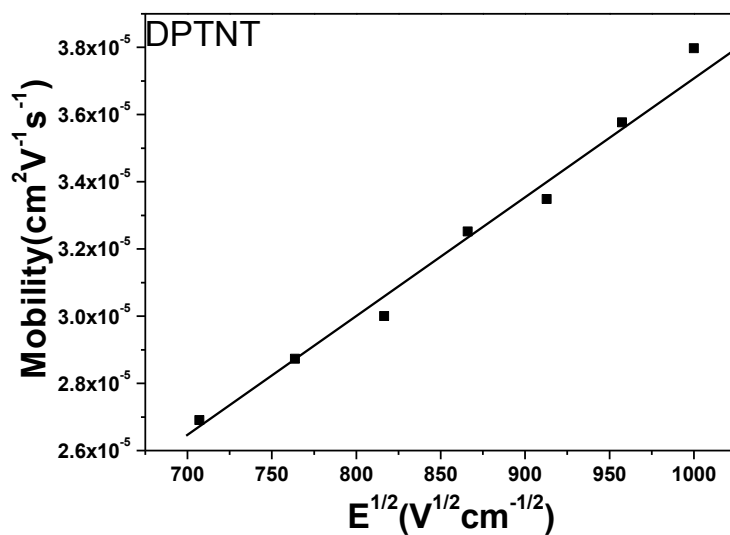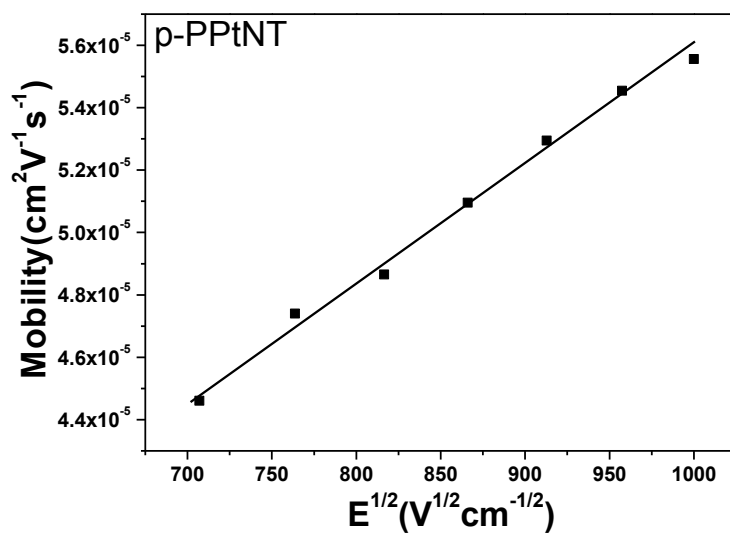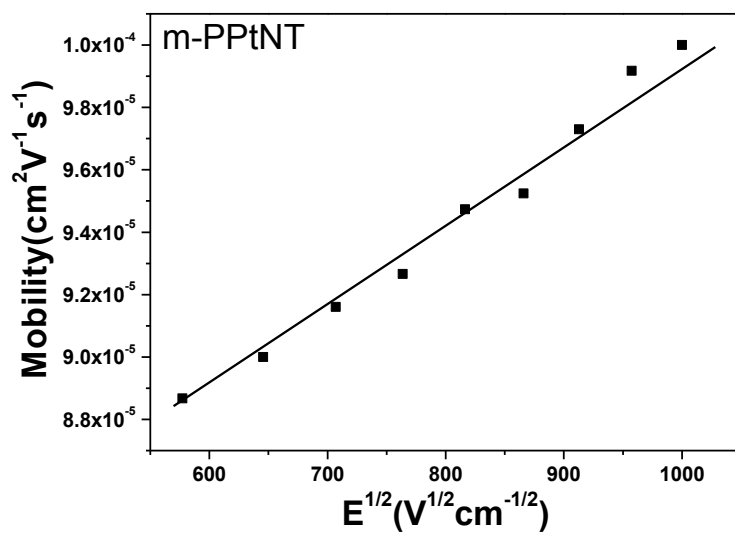

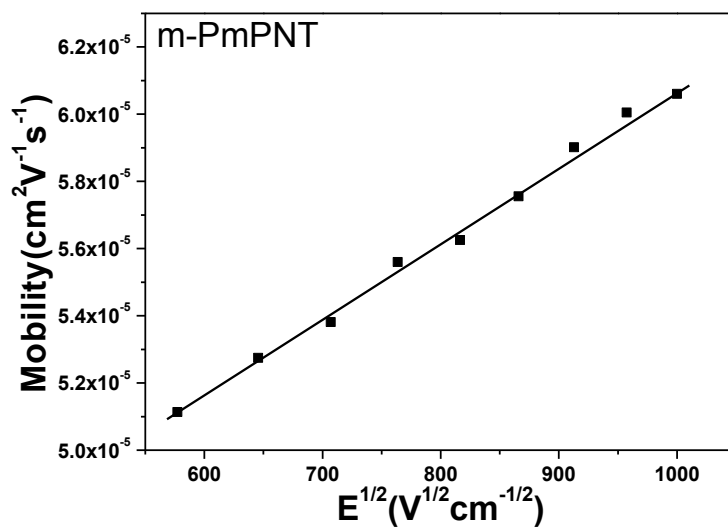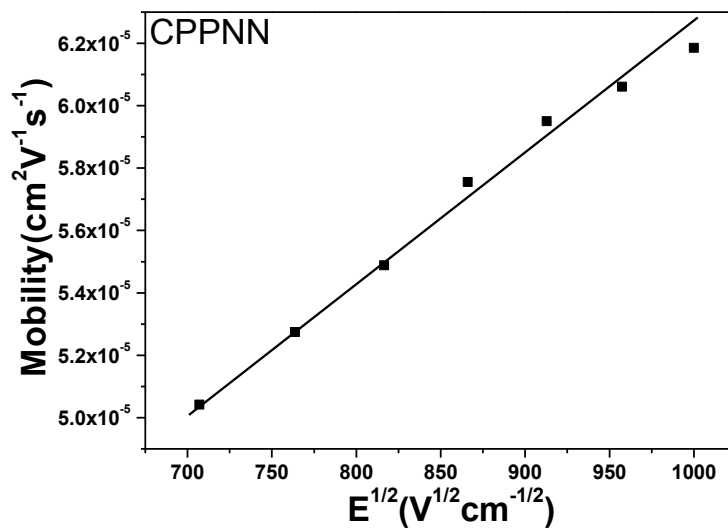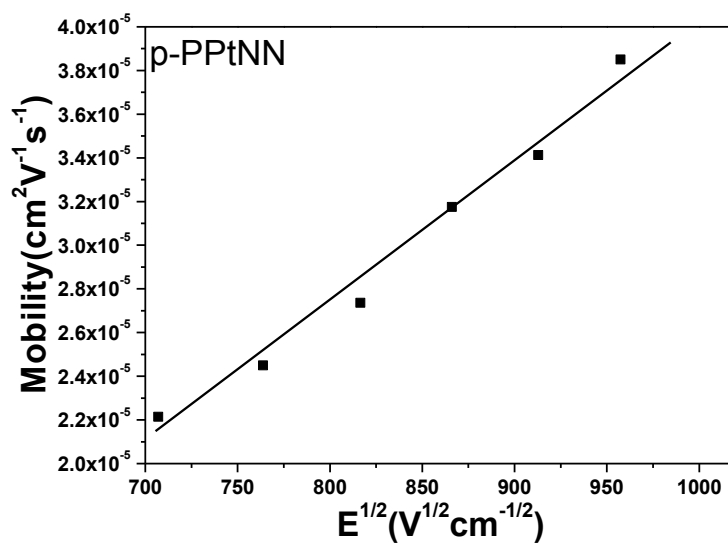

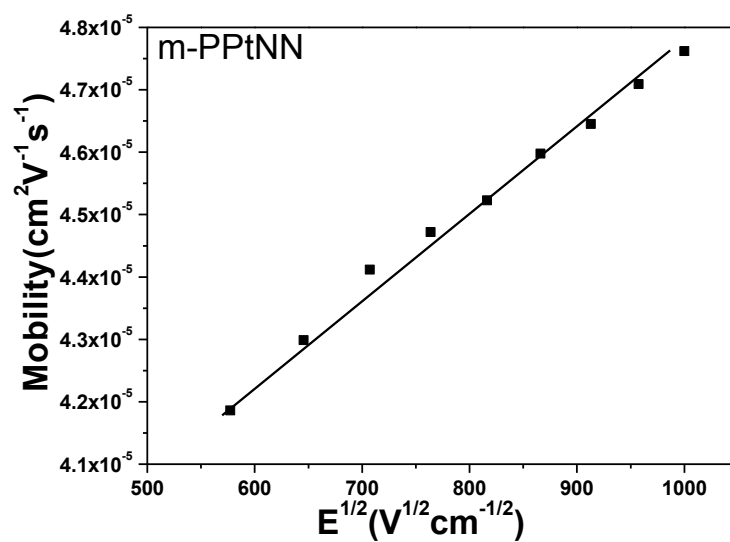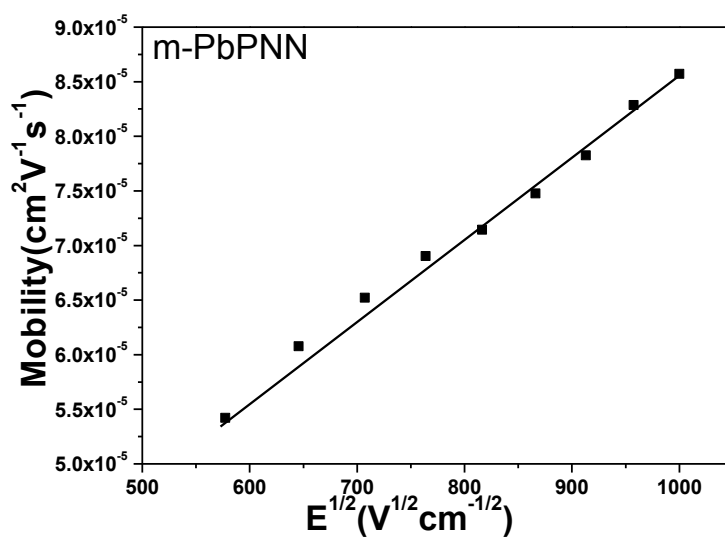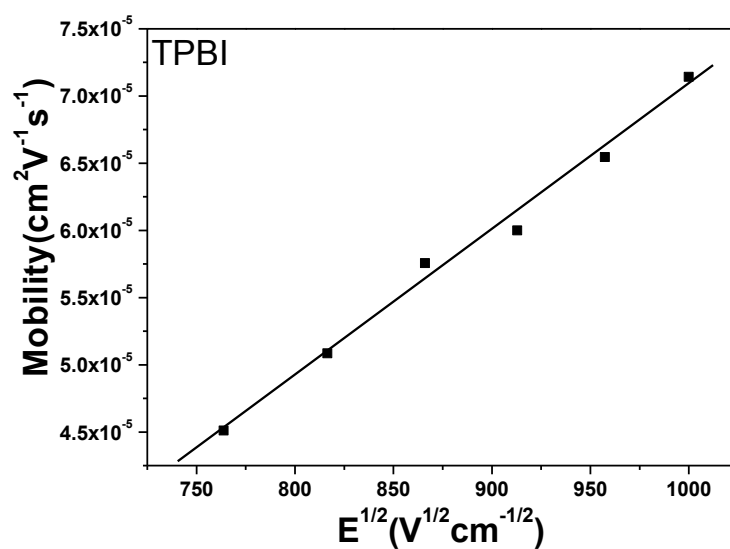

Figure S1. Electron mobilities measured by transient electroluminescence (EL) method.

**Table S1.** Absorption and fluorescent emission spectral data of the two groups of triphenylpyridine derivatives in different solvents at room temperature.

| Compound                                              |                                                                     | c-C <sub>6</sub> H <sub>12</sub> <sup>[a]</sup> | CH <sub>2</sub> Cl <sub>2</sub> | THF <sup>[b]</sup> | CH <sub>3</sub> CN | CH <sub>3</sub> OH |
|-------------------------------------------------------|---------------------------------------------------------------------|-------------------------------------------------|---------------------------------|--------------------|--------------------|--------------------|
| DPTNT<br>[M]=1*10 <sup>-5</sup> mol L <sup>-1</sup>   | $\lambda_{\text{max.}}^{\text{ab.}}/\text{nm}$                      | 270/312                                         | 270/311                         | 270/318            | 267/316            | 269/318            |
|                                                       | $\varepsilon^{\text{[c]}}/\text{dm}^3\text{mol}^{-1}\text{cm}^{-1}$ | 36000/<br>15600                                 | 32900/<br>18300                 | 33900/<br>17300    | 32100/<br>17600    | 31600/<br>17900    |
|                                                       | $\lambda_{\text{max.}}^{\text{em.}}/\text{nm}$                      | 365                                             | 374                             | 375                | 375                | 378                |
|                                                       | $\varphi_{\text{em.}}^{\text{[d]}}/\%$                              | 6.07                                            | 8.64                            | 8.60               | 7.51               | 7.33               |
| p-PPtNT<br>[M]=2*10 <sup>-6</sup> mol L <sup>-1</sup> | $\lambda_{\text{max.}}^{\text{ab.}}/\text{nm}$                      | 281/320                                         | 281/323                         | 282/323            | 280/323            | 281/333            |
|                                                       | $\varepsilon/\text{dm}^3\text{mol}^{-1}\text{cm}^{-1}$              | 49500/<br>23000                                 | 60000/<br>33500                 | 60000/<br>32000    | 51000/<br>32000    | 45000/<br>27500    |
|                                                       | $\lambda_{\text{max.}}^{\text{em.}}/\text{nm}$                      | 377                                             | 389                             | 389                | 397                | 406                |
|                                                       | $\varphi_{\text{em.}}/\%$                                           | 9.18                                            | 27.48                           | 27.78              | 20.82              | 9.34               |
| m-PPtNT<br>[M]=2*10 <sup>-6</sup> mol L <sup>-1</sup> | $\lambda_{\text{max.}}^{\text{ab.}}/\text{nm}$                      | 272/309                                         | 272/321                         | 272/322            | 268/320            | 273                |
|                                                       | $\varepsilon/\text{dm}^3\text{mol}^{-1}\text{cm}^{-1}$              | 10500/<br>6000                                  | 64500/<br>37500                 | 68000/<br>36000    | 56500/<br>32000    | 11500              |
|                                                       | $\lambda_{\text{max.}}^{\text{em.}}/\text{nm}$                      | 362                                             | 376                             | 373                | 380                | 401                |
|                                                       | $\varphi_{\text{em.}}/\%$                                           | 23.40                                           | 27.83                           | 25.93              | 24.05              | 24.05              |
| m-PmPNT<br>[M]=5*10 <sup>-6</sup> mol L <sup>-1</sup> | $\lambda_{\text{max.}}^{\text{ab.}}/\text{nm}$                      | 271/334                                         | 273/336                         | 274/336            | 271/333            | 272/334            |
|                                                       | $\varepsilon/\text{dm}^3\text{mol}^{-1}\text{cm}^{-1}$              | 7200/<br>7200                                   | 47800/<br>50000                 | 49200/<br>49400    | 48400/<br>48200    | 8600/<br>8800      |
|                                                       | $\lambda_{\text{max.}}^{\text{em.}}/\text{nm}$                      | 379                                             | 403                             | 409                | 425                | 431                |
|                                                       | $\varphi_{\text{em.}}/\%$                                           | 41.21                                           | 76.77                           | 82.22              | 73.46              | 44.44              |
| CPPNN<br>[M]=5*10 <sup>-6</sup> mol L <sup>-1</sup>   | $\lambda_{\text{max.}}^{\text{ab.}}/\text{nm}$                      | 268/318                                         | 268/319                         | 268/320            | 265/316            | 265/318            |
|                                                       | $\varepsilon/\text{dm}^3\text{mol}^{-1}\text{cm}^{-1}$              | 28600/<br>7800                                  | 32400/<br>10800                 | 32000/<br>10400    | 32200/<br>10400    | 32200/<br>10400    |
|                                                       | $\lambda_{\text{max.}}^{\text{em.}}/\text{nm}$                      | 378                                             | 386                             | 389                | 391                | 392                |
|                                                       | $\varphi_{\text{em.}}/\%$                                           | 12.11                                           | 13.76                           | 12.93              | 12.62              | 12.58              |
| p-PPtNN<br>[M]=2*10 <sup>-6</sup> mol L <sup>-1</sup> | $\lambda_{\text{max.}}^{\text{ab.}}/\text{nm}$                      | 278/338                                         | 279/341                         | 280/342            | 277/340            | 282/341            |
|                                                       | $\varepsilon/\text{dm}^3\text{mol}^{-1}\text{cm}^{-1}$              | 19000/<br>13500                                 | 57000/<br>56000                 | 55500/<br>55000    | 22500/<br>23500    | 19500/<br>20500    |
|                                                       | $\lambda_{\text{max.}}^{\text{em.}}/\text{nm}$                      | 366/384                                         | 371/389                         | 370/389            | 371/386            | 372/387            |
|                                                       | $\varphi_{\text{em.}}/\%$                                           | 42.24                                           | 100                             | 100                | 63.12              | 14.64              |
| m-PPtNN<br>[M]=2*10 <sup>-6</sup> mol L <sup>-1</sup> | $\lambda_{\text{max.}}^{\text{ab.}}/\text{nm}$                      | 269/311                                         | 270/313                         | 271/313            | 268/313            | 268/313            |
|                                                       | $\varepsilon/\text{dm}^3\text{mol}^{-1}\text{cm}^{-1}$              | 63000/<br>19000                                 | 90000/<br>34000                 | 96000/<br>35000    | 88000/<br>34500    | 33000/<br>16000    |
|                                                       | $\lambda_{\text{max.}}^{\text{em.}}/\text{nm}$                      | 365                                             | 370                             | 368                | 367                | 381                |
|                                                       | $\varphi_{\text{em.}}/\%$                                           | 9.70                                            | 13.93                           | 13.34              | 9.26               | 9.24               |
| m-PbPNN<br>[M]=1*10 <sup>-5</sup> mol L <sup>-1</sup> | $\lambda_{\text{max.}}^{\text{ab.}}/\text{nm}$                      | 270/311                                         | 271/311                         | 271/311            | 268/307            | 269/310            |
|                                                       | $\varepsilon/\text{dm}^3\text{mol}^{-1}\text{cm}^{-1}$              | 87900/<br>26000                                 | 82600/<br>31400                 | 80900/<br>29400    | 82400/<br>32100    | 81700/<br>32000    |
|                                                       | $\lambda_{\text{max.}}^{\text{em.}}/\text{nm}$                      | 362                                             | 367                             | 368                | 370                | 371                |
|                                                       | $\varphi_{\text{em.}}/\%$                                           | 6.28                                            | 8.50                            | 7.25               | 6.36               | 6.27               |

[a] c-C<sub>6</sub>H<sub>12</sub>: cyclohexane. [b] THF: tetrahydrofuran. [c]  $\varepsilon$ : molar extinction coefficient. [d]  $\varphi_{\text{em.}}$ : emission quantum yield.

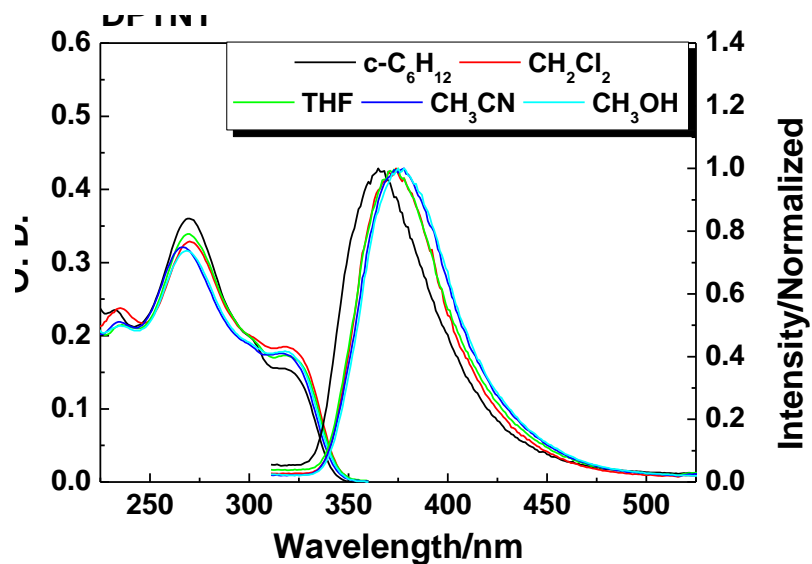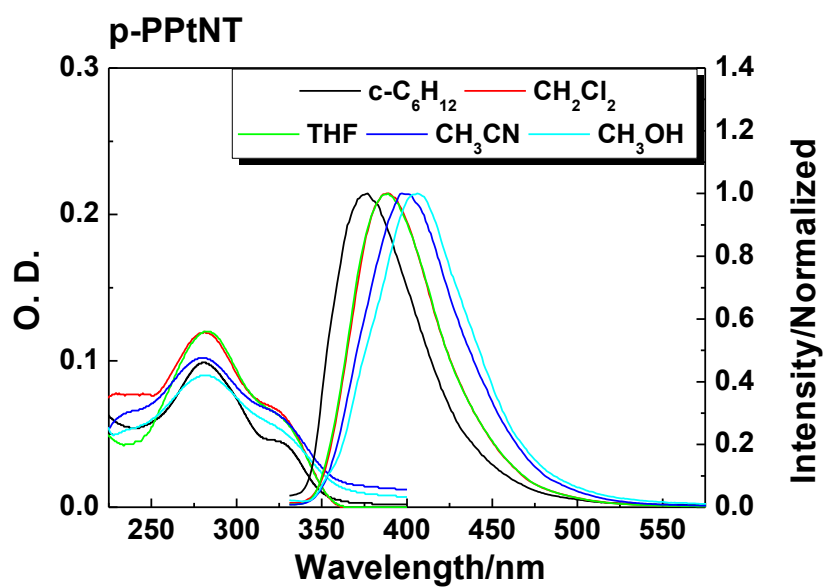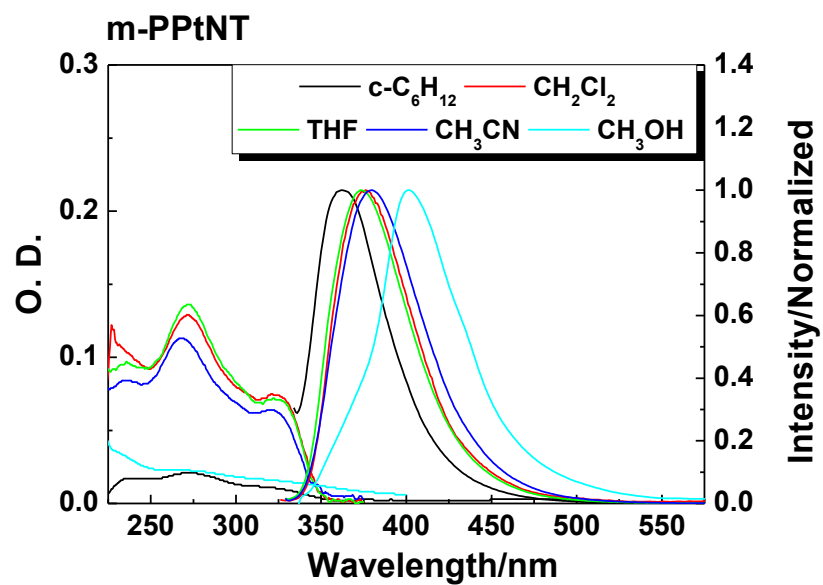

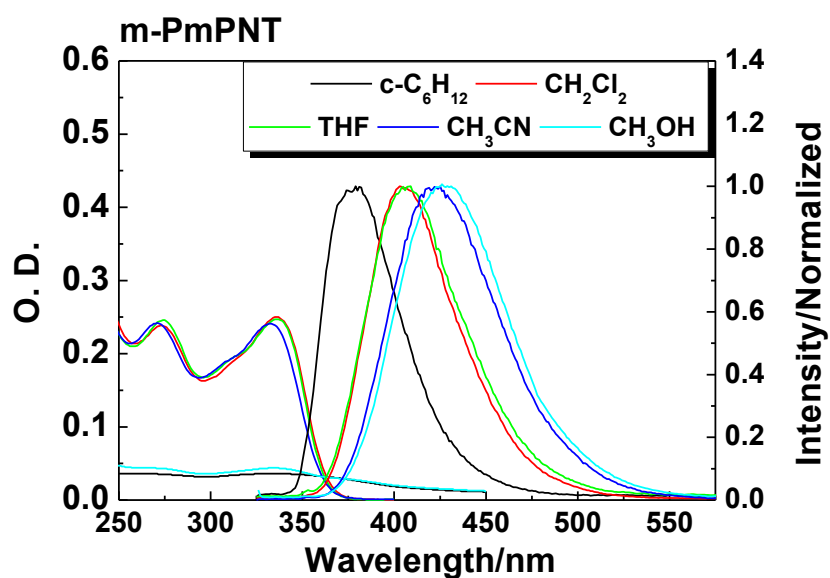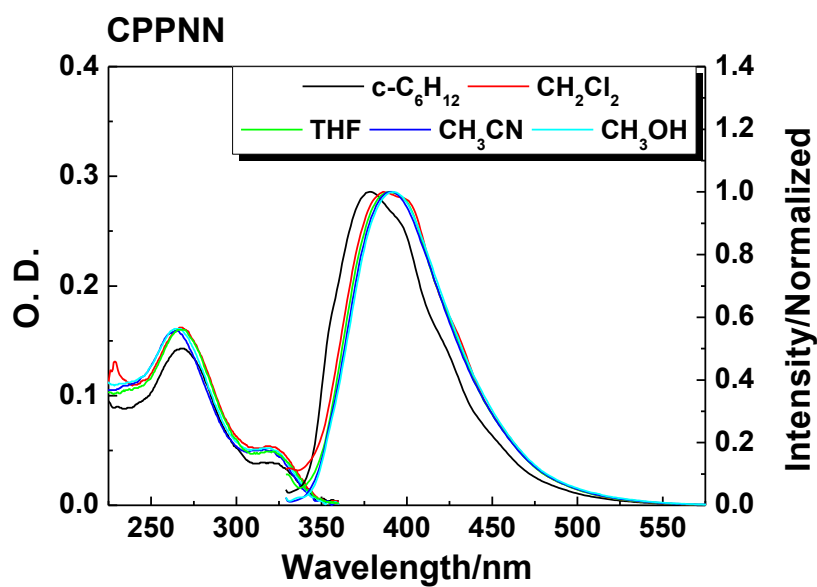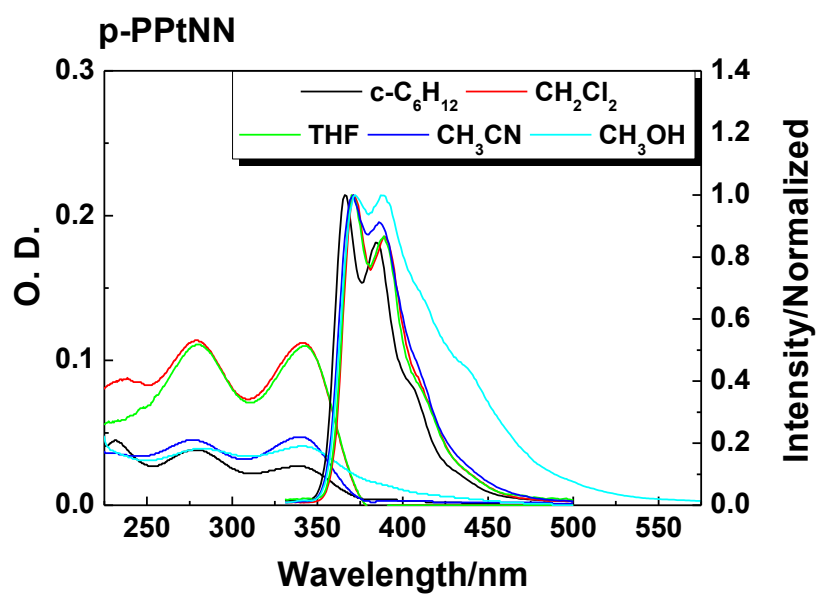

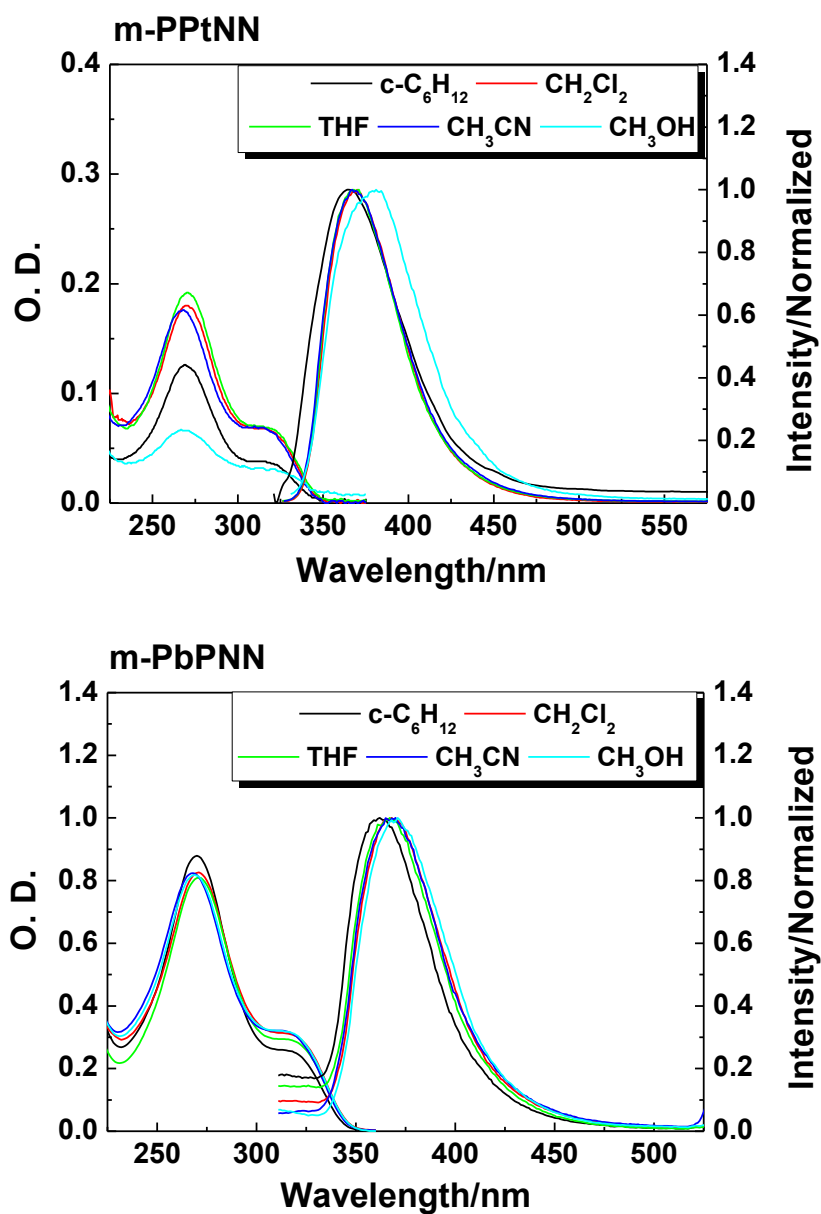

**Figure S2.** Absorption and fluorescent emission spectra of the two groups of triphenylpyridine derivatives in different solvents at room temperature.



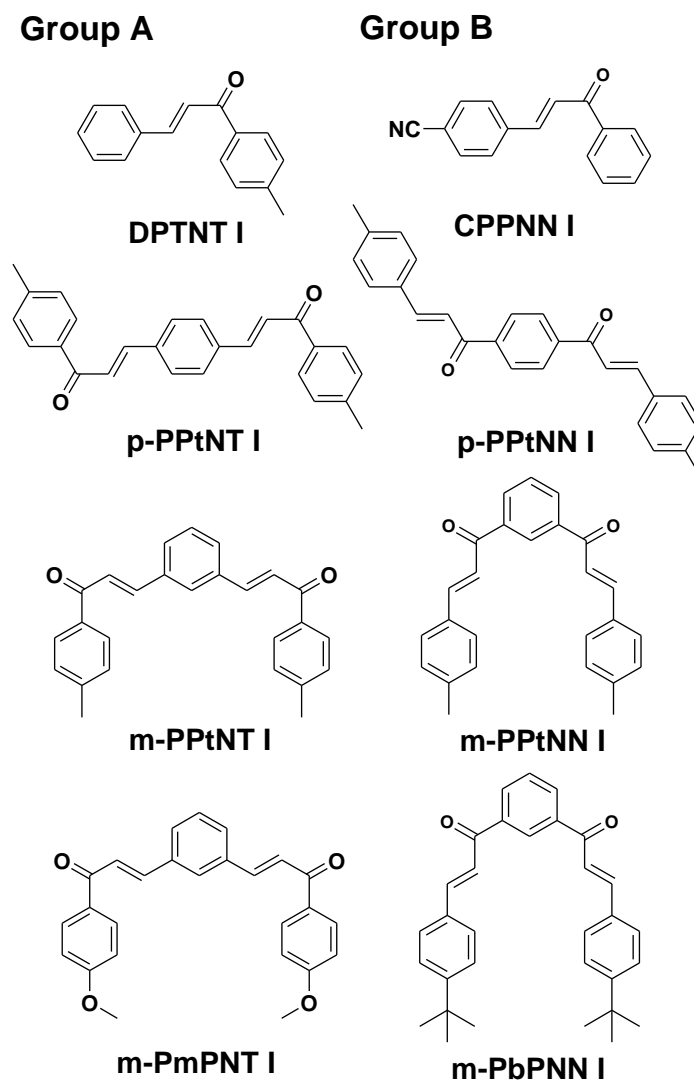

**Scheme S1.** The molecular structures of the corresponding intermediate products for the two groups of triphenylpyridine derivatives.
